# Supplementary material for: Hydrogeochemical factors affecting the mobilization of As into the groundwater of the Brahmaputra alluvial plains of Assam, Northeast India
Source: Royal Society of Chemistry journal article supplement (doi:10.1039/c3em00156c), 2013-01-01
Supplement: c3em00156c.pdf [file c3em00156c.pdf]

## Appendix

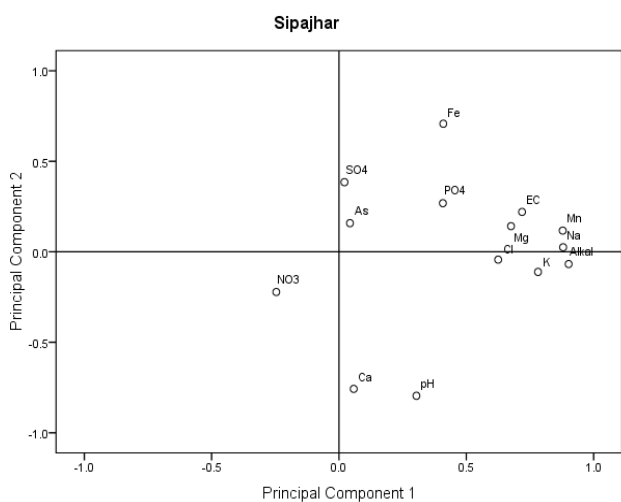

**Fig. A.1** PCA plots of groundwater quality parameters at Sipajhar site of Darrang district.

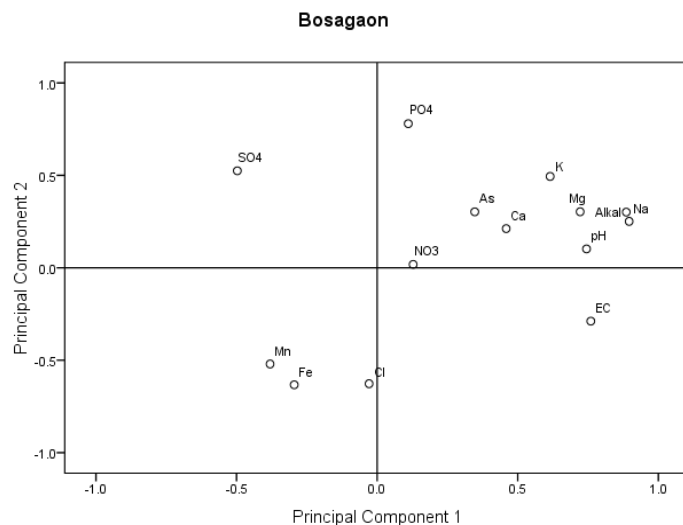

**Fig. A.3** PCA plots of groundwater quality parameters in Site\_3.

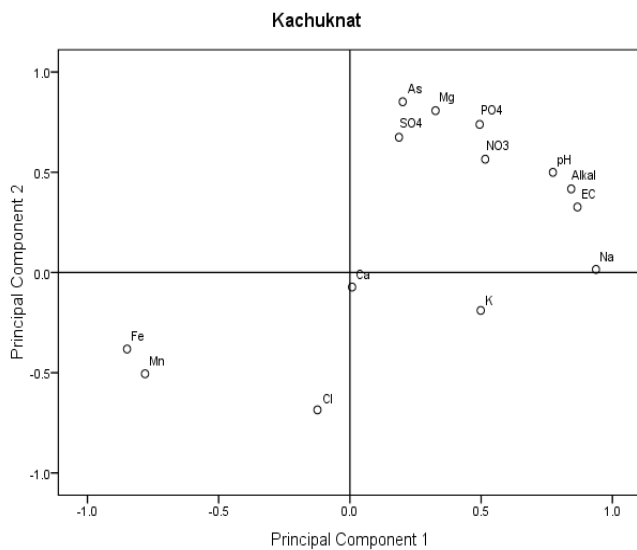

**Fig. A.2** PCA plots of groundwater quality parameters in Site\_2.

25

5

10

15

20
